# Supplementary material
Source: PubMed Central journal article supplement (PMC7269591)

**A**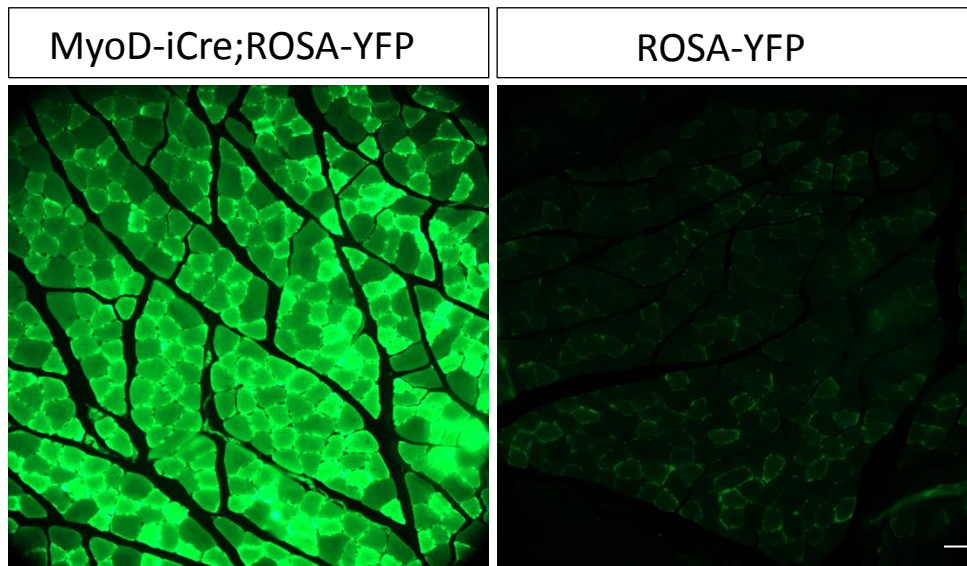**B**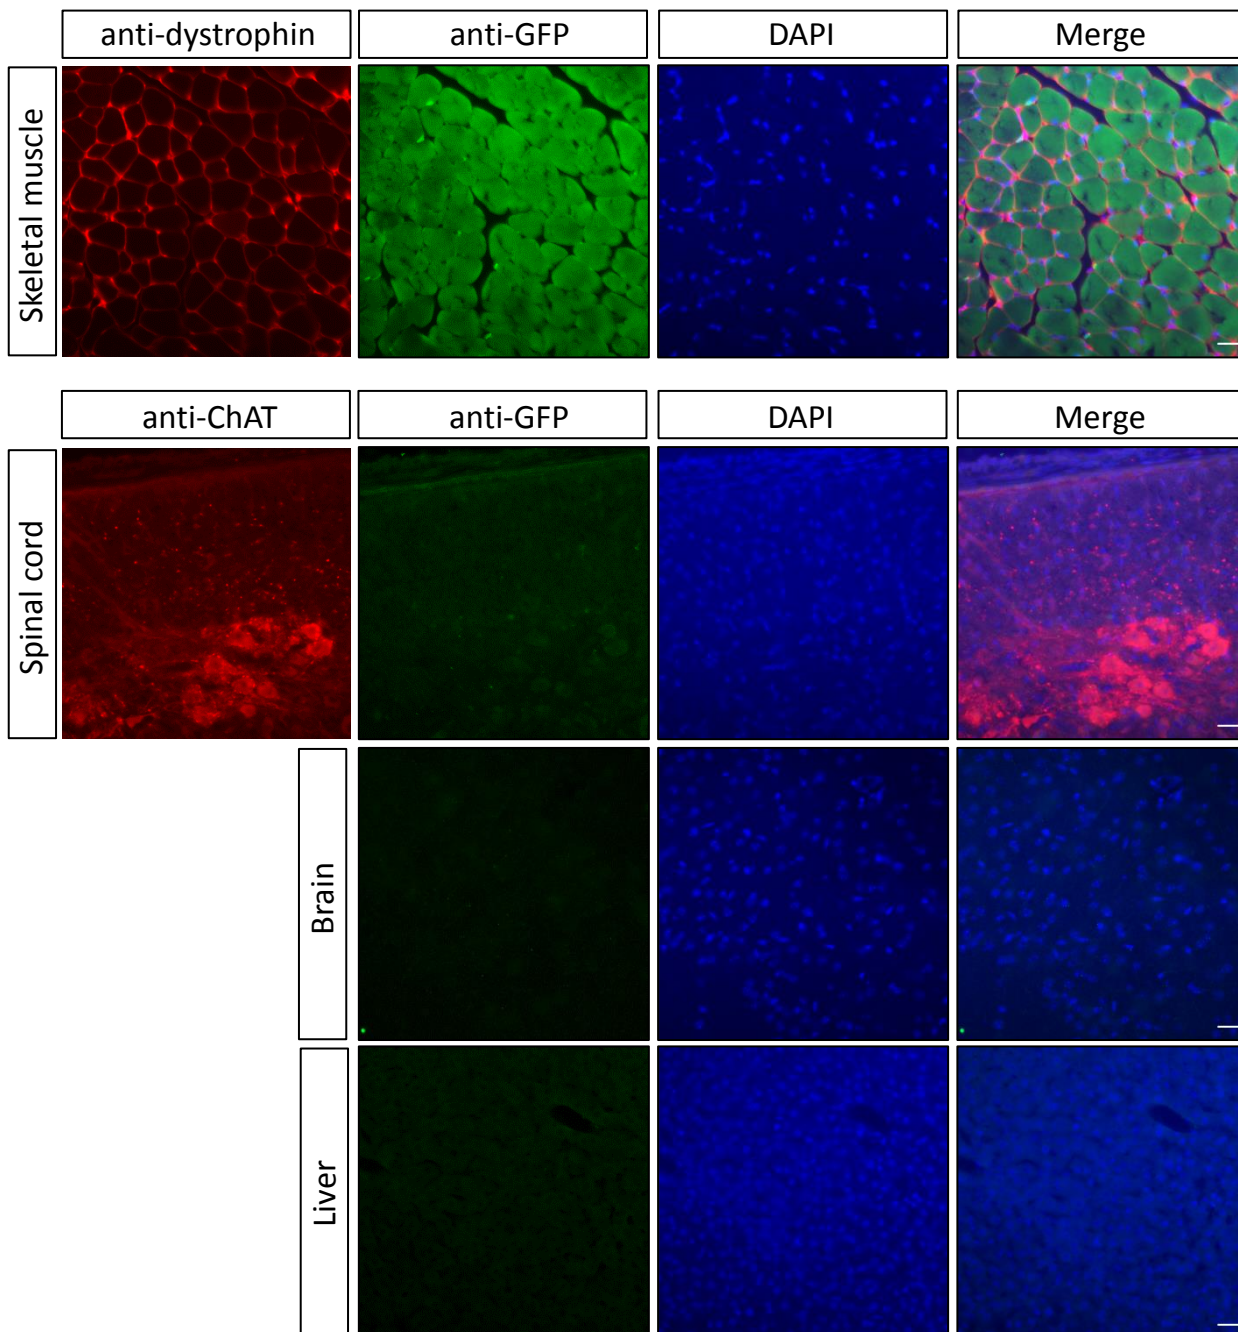**Supplemental Figure 1**

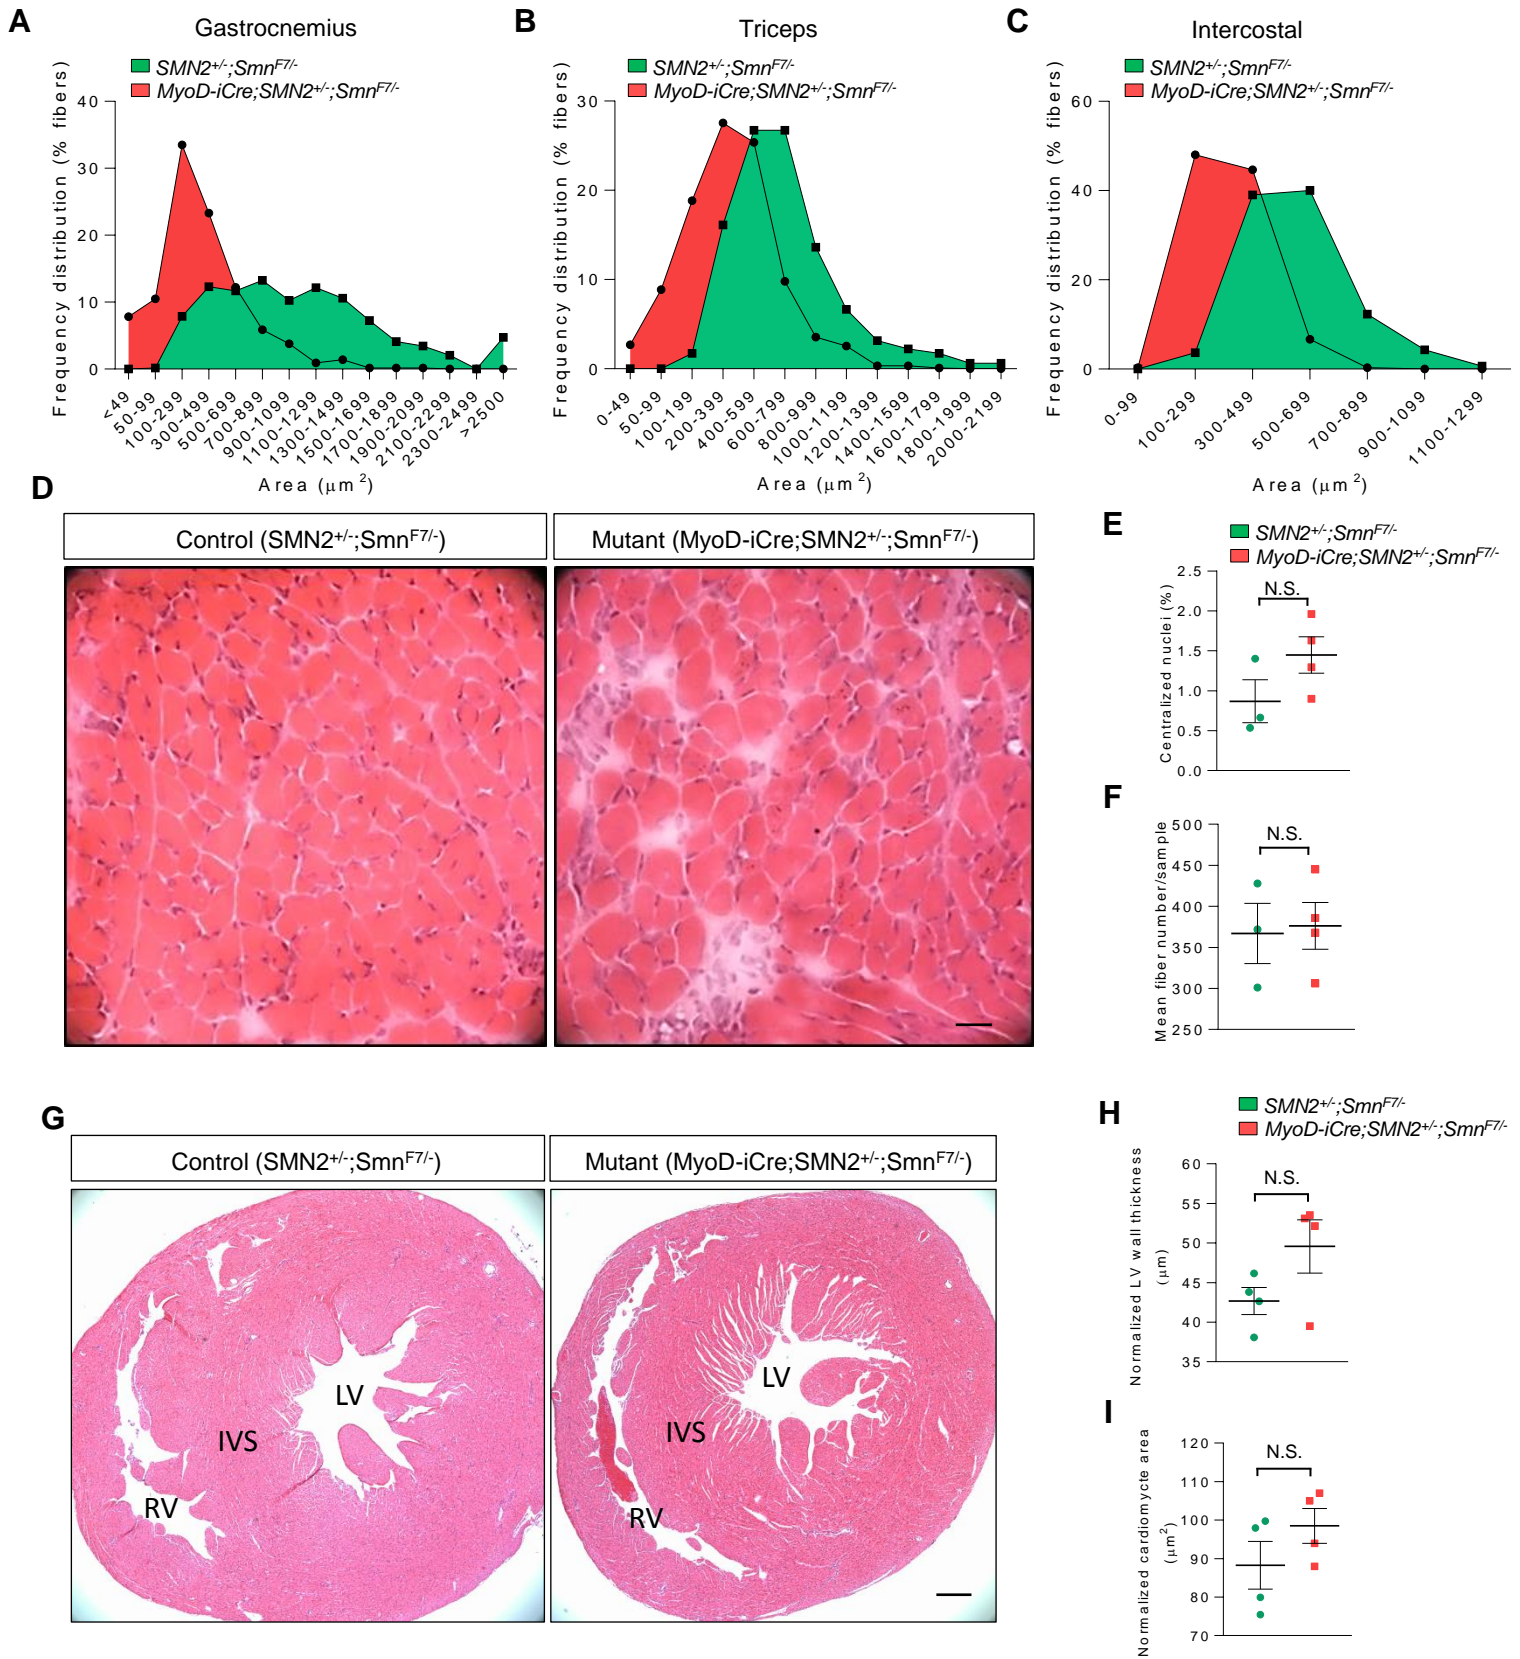

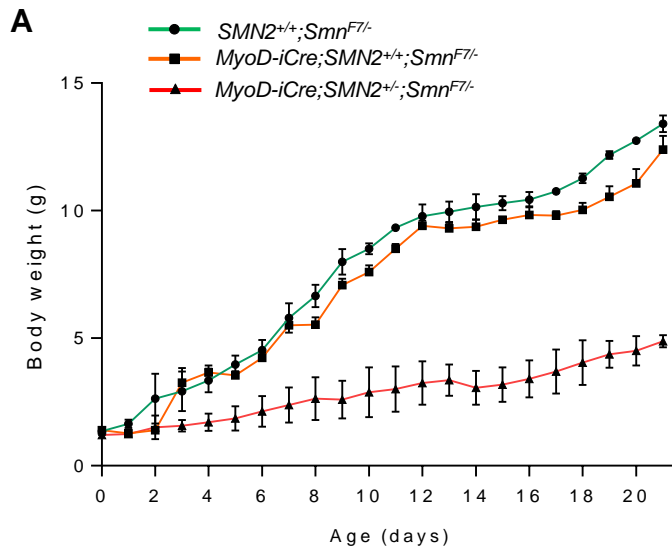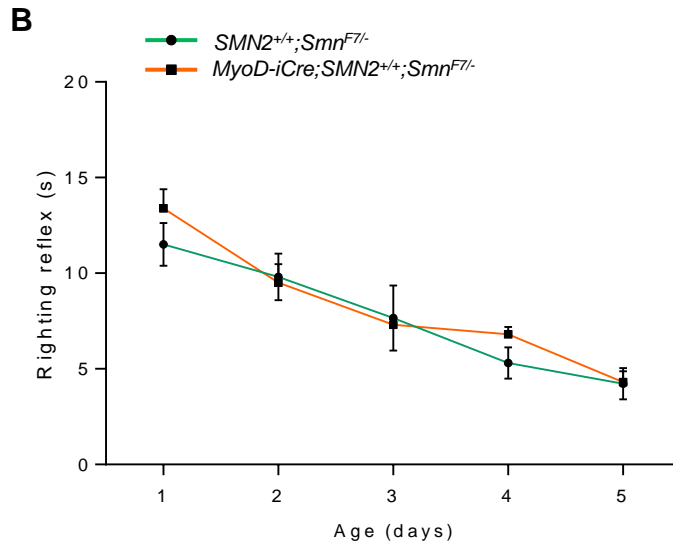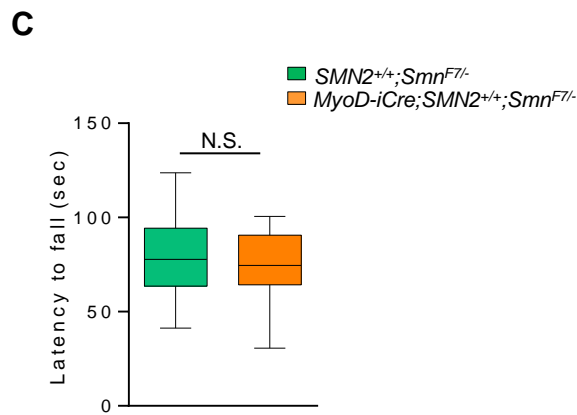

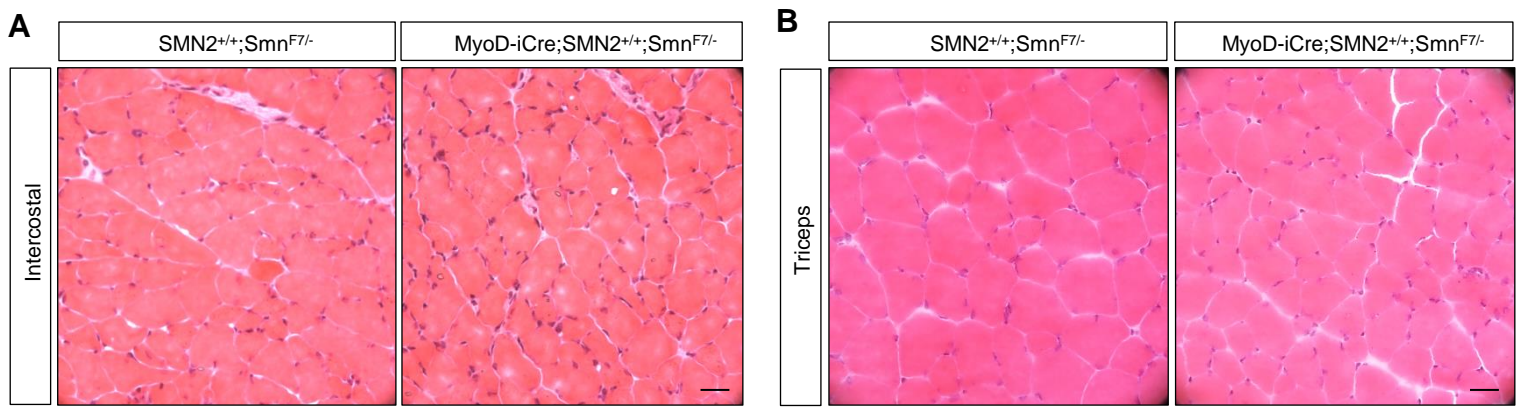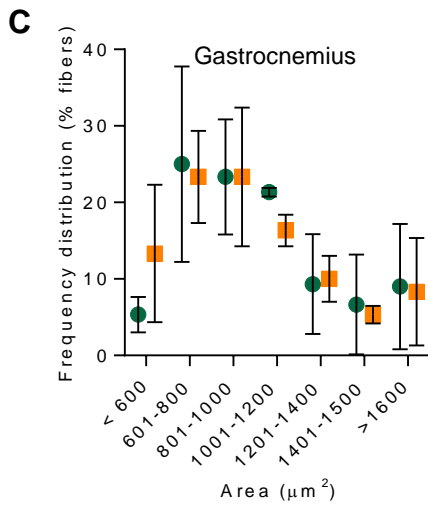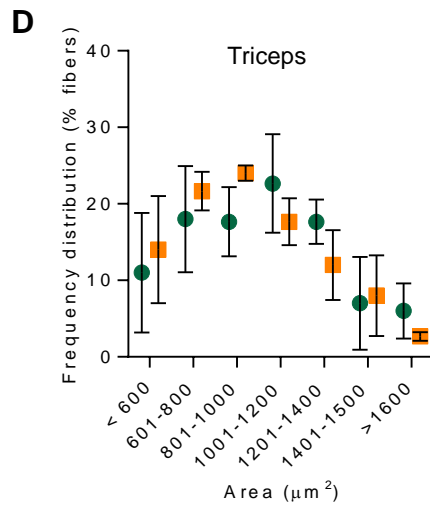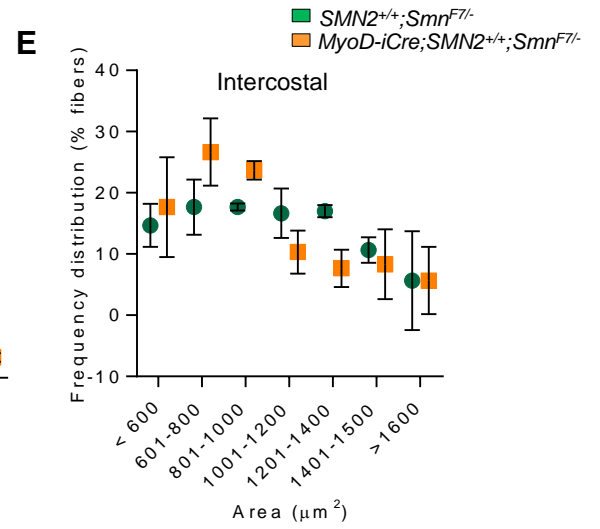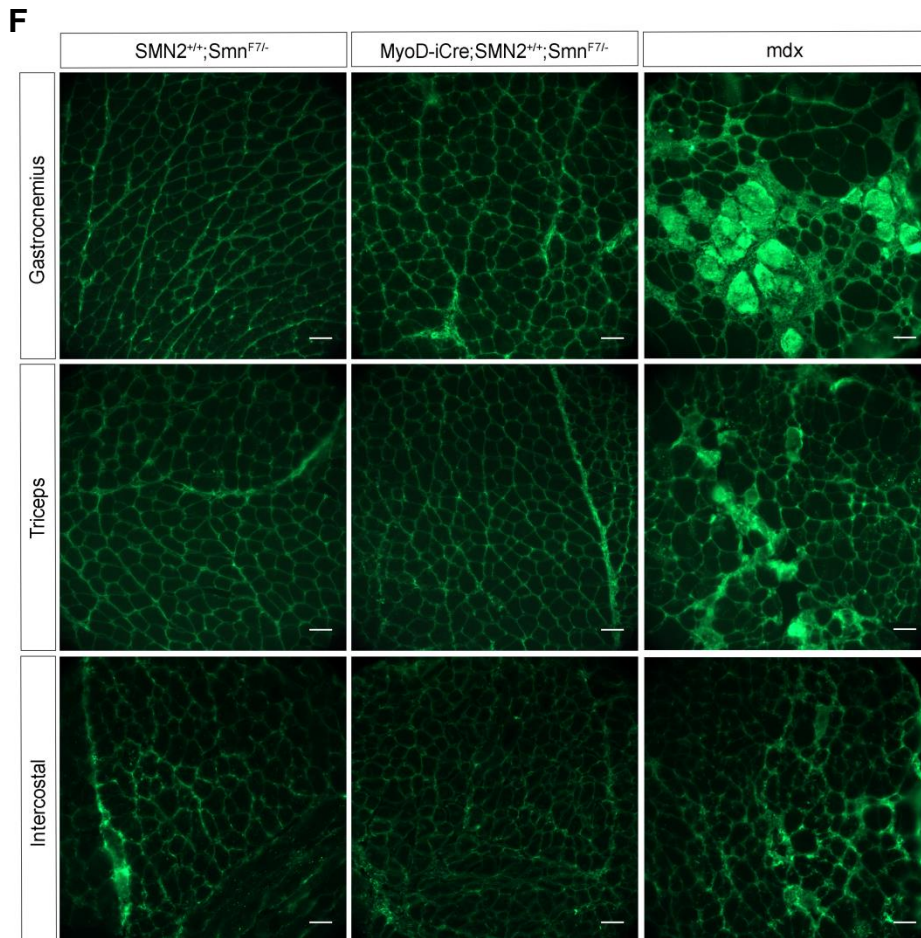

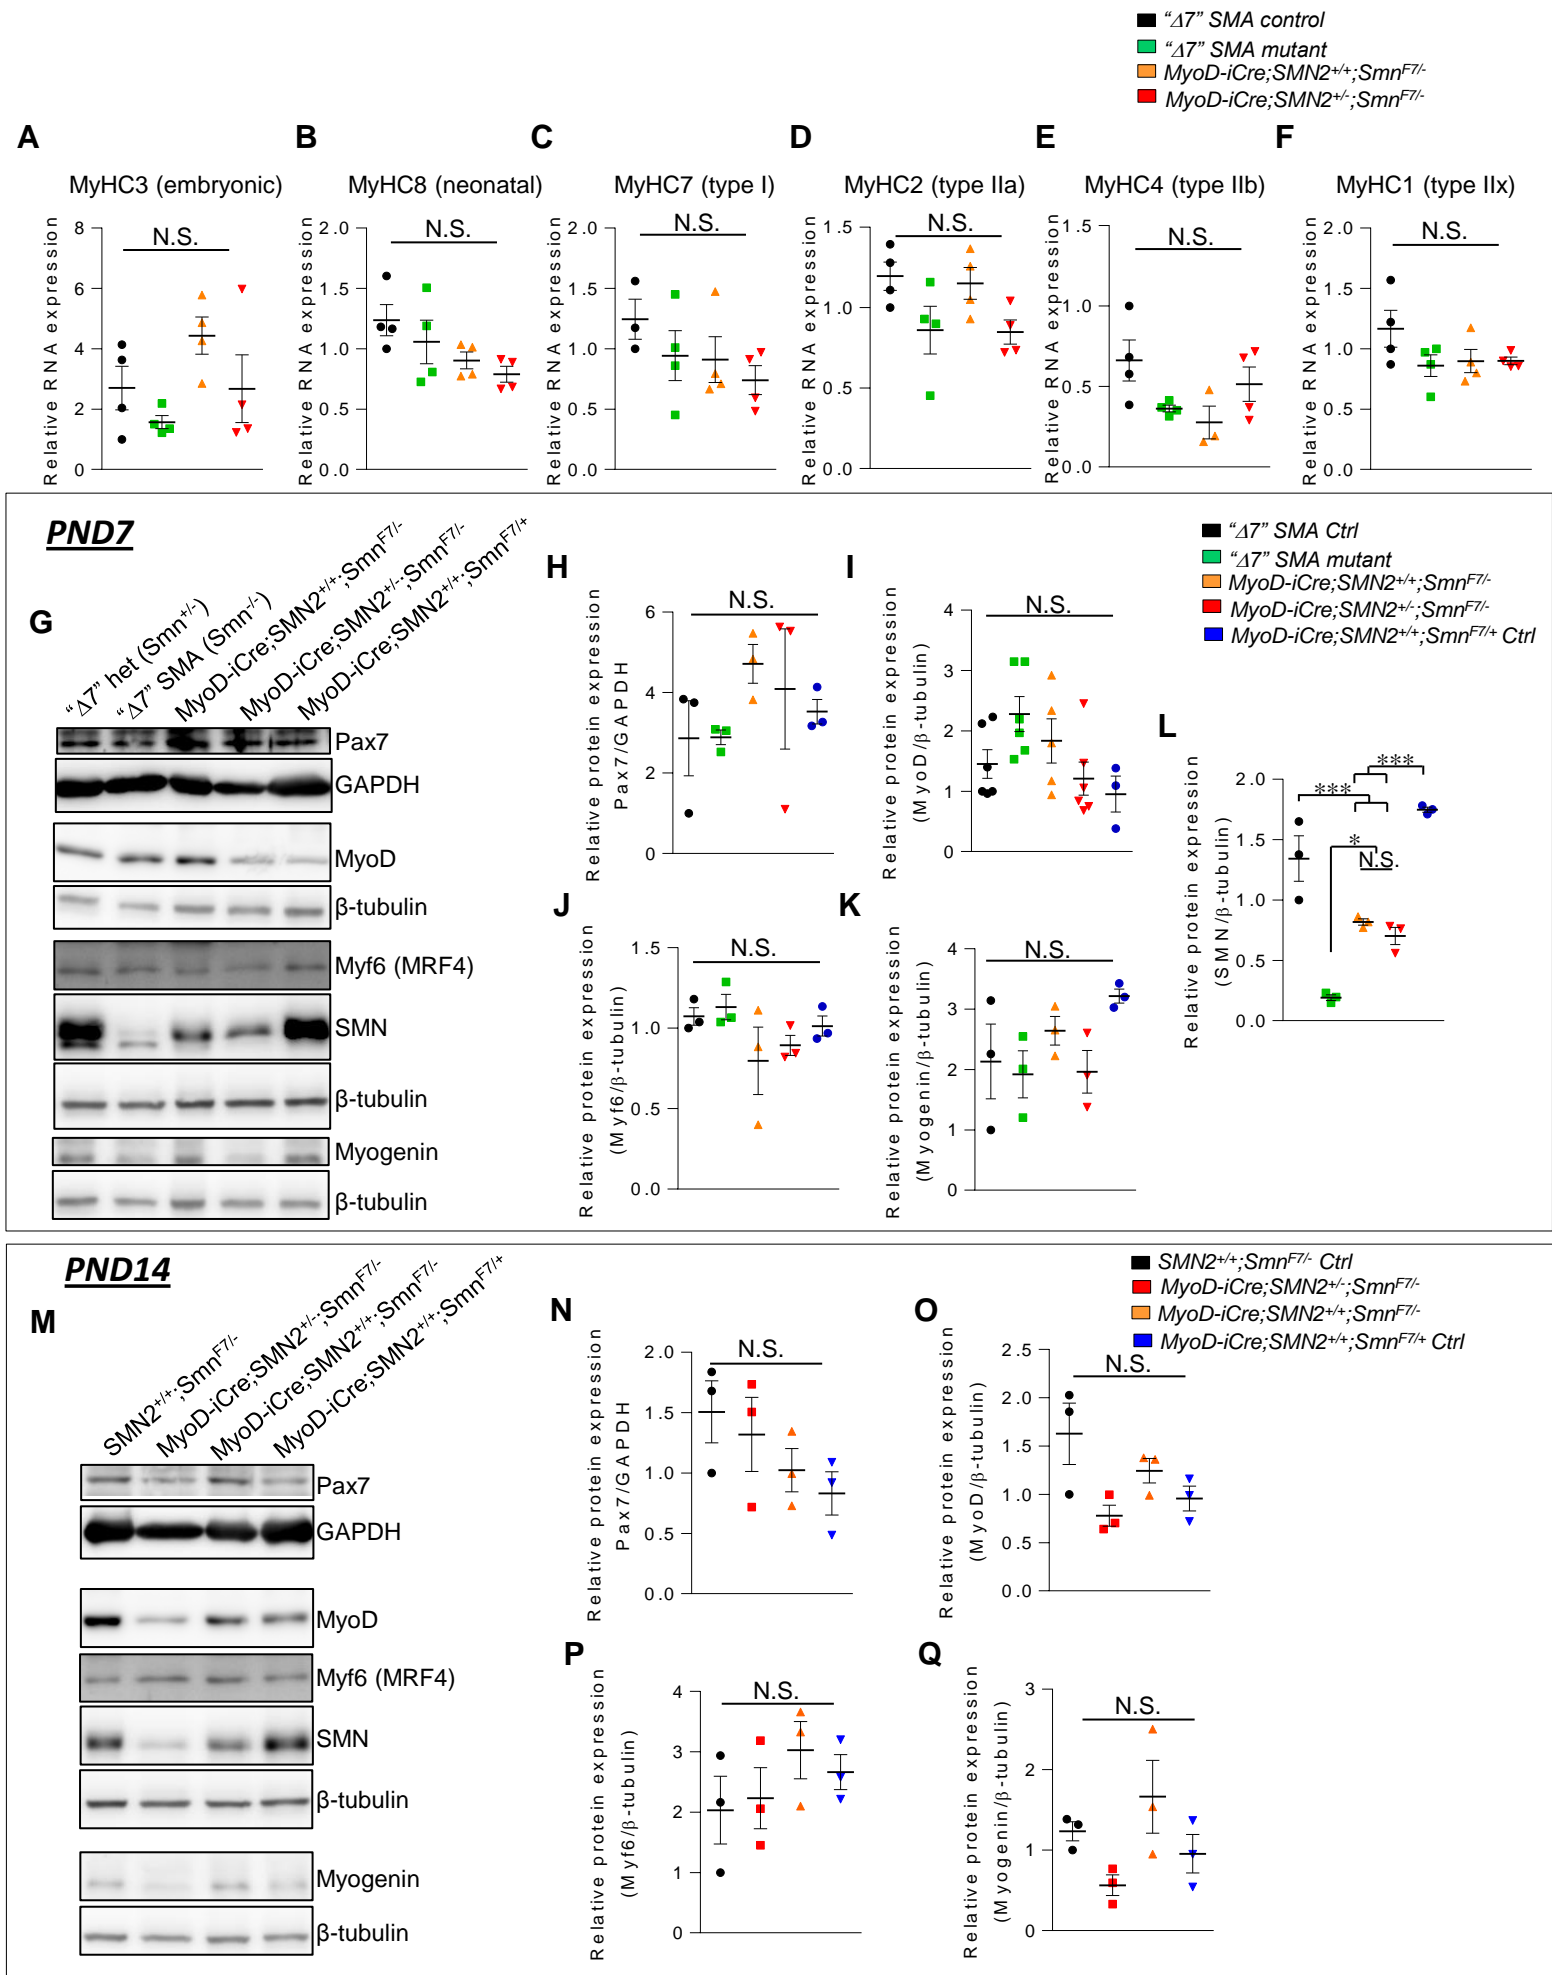

Supplemental Figure 5

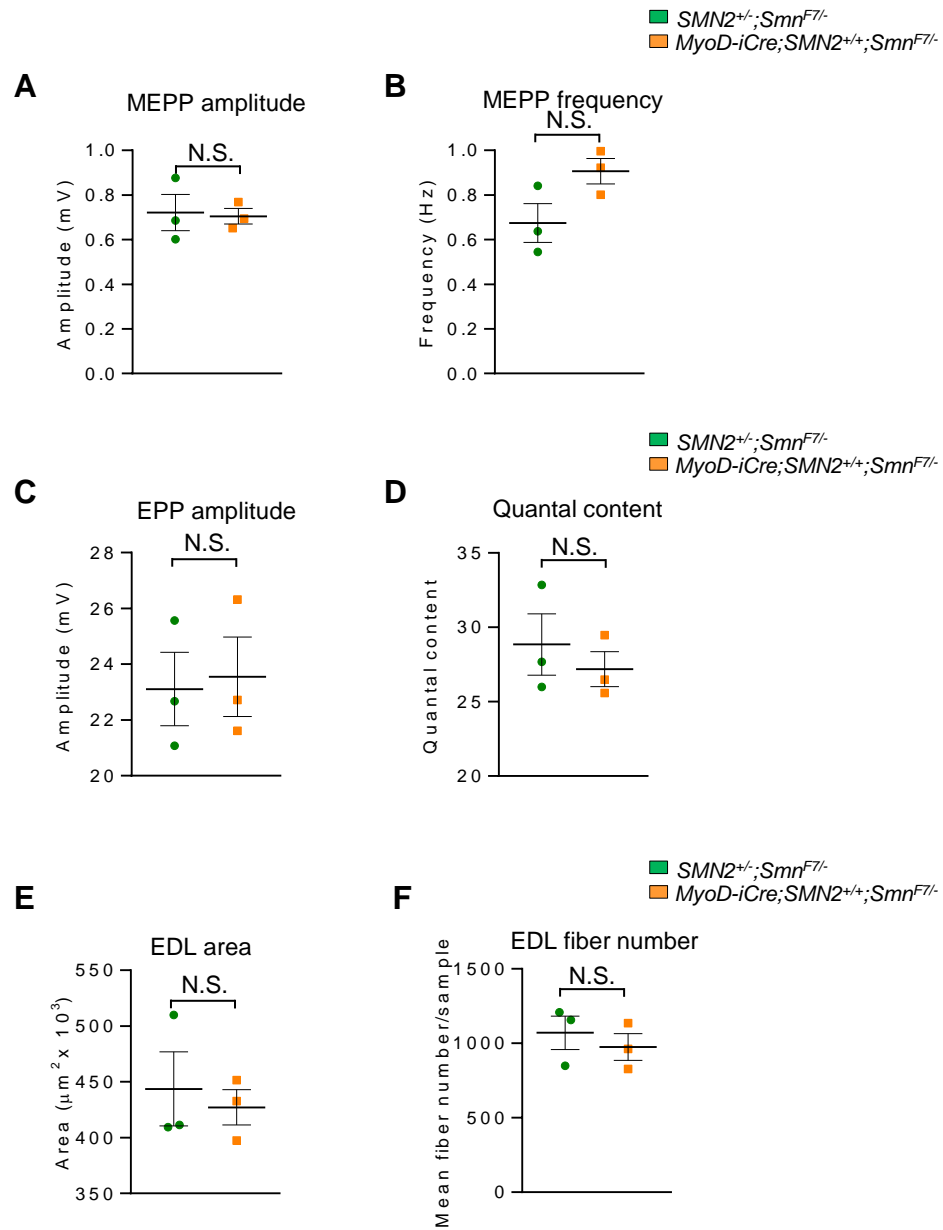

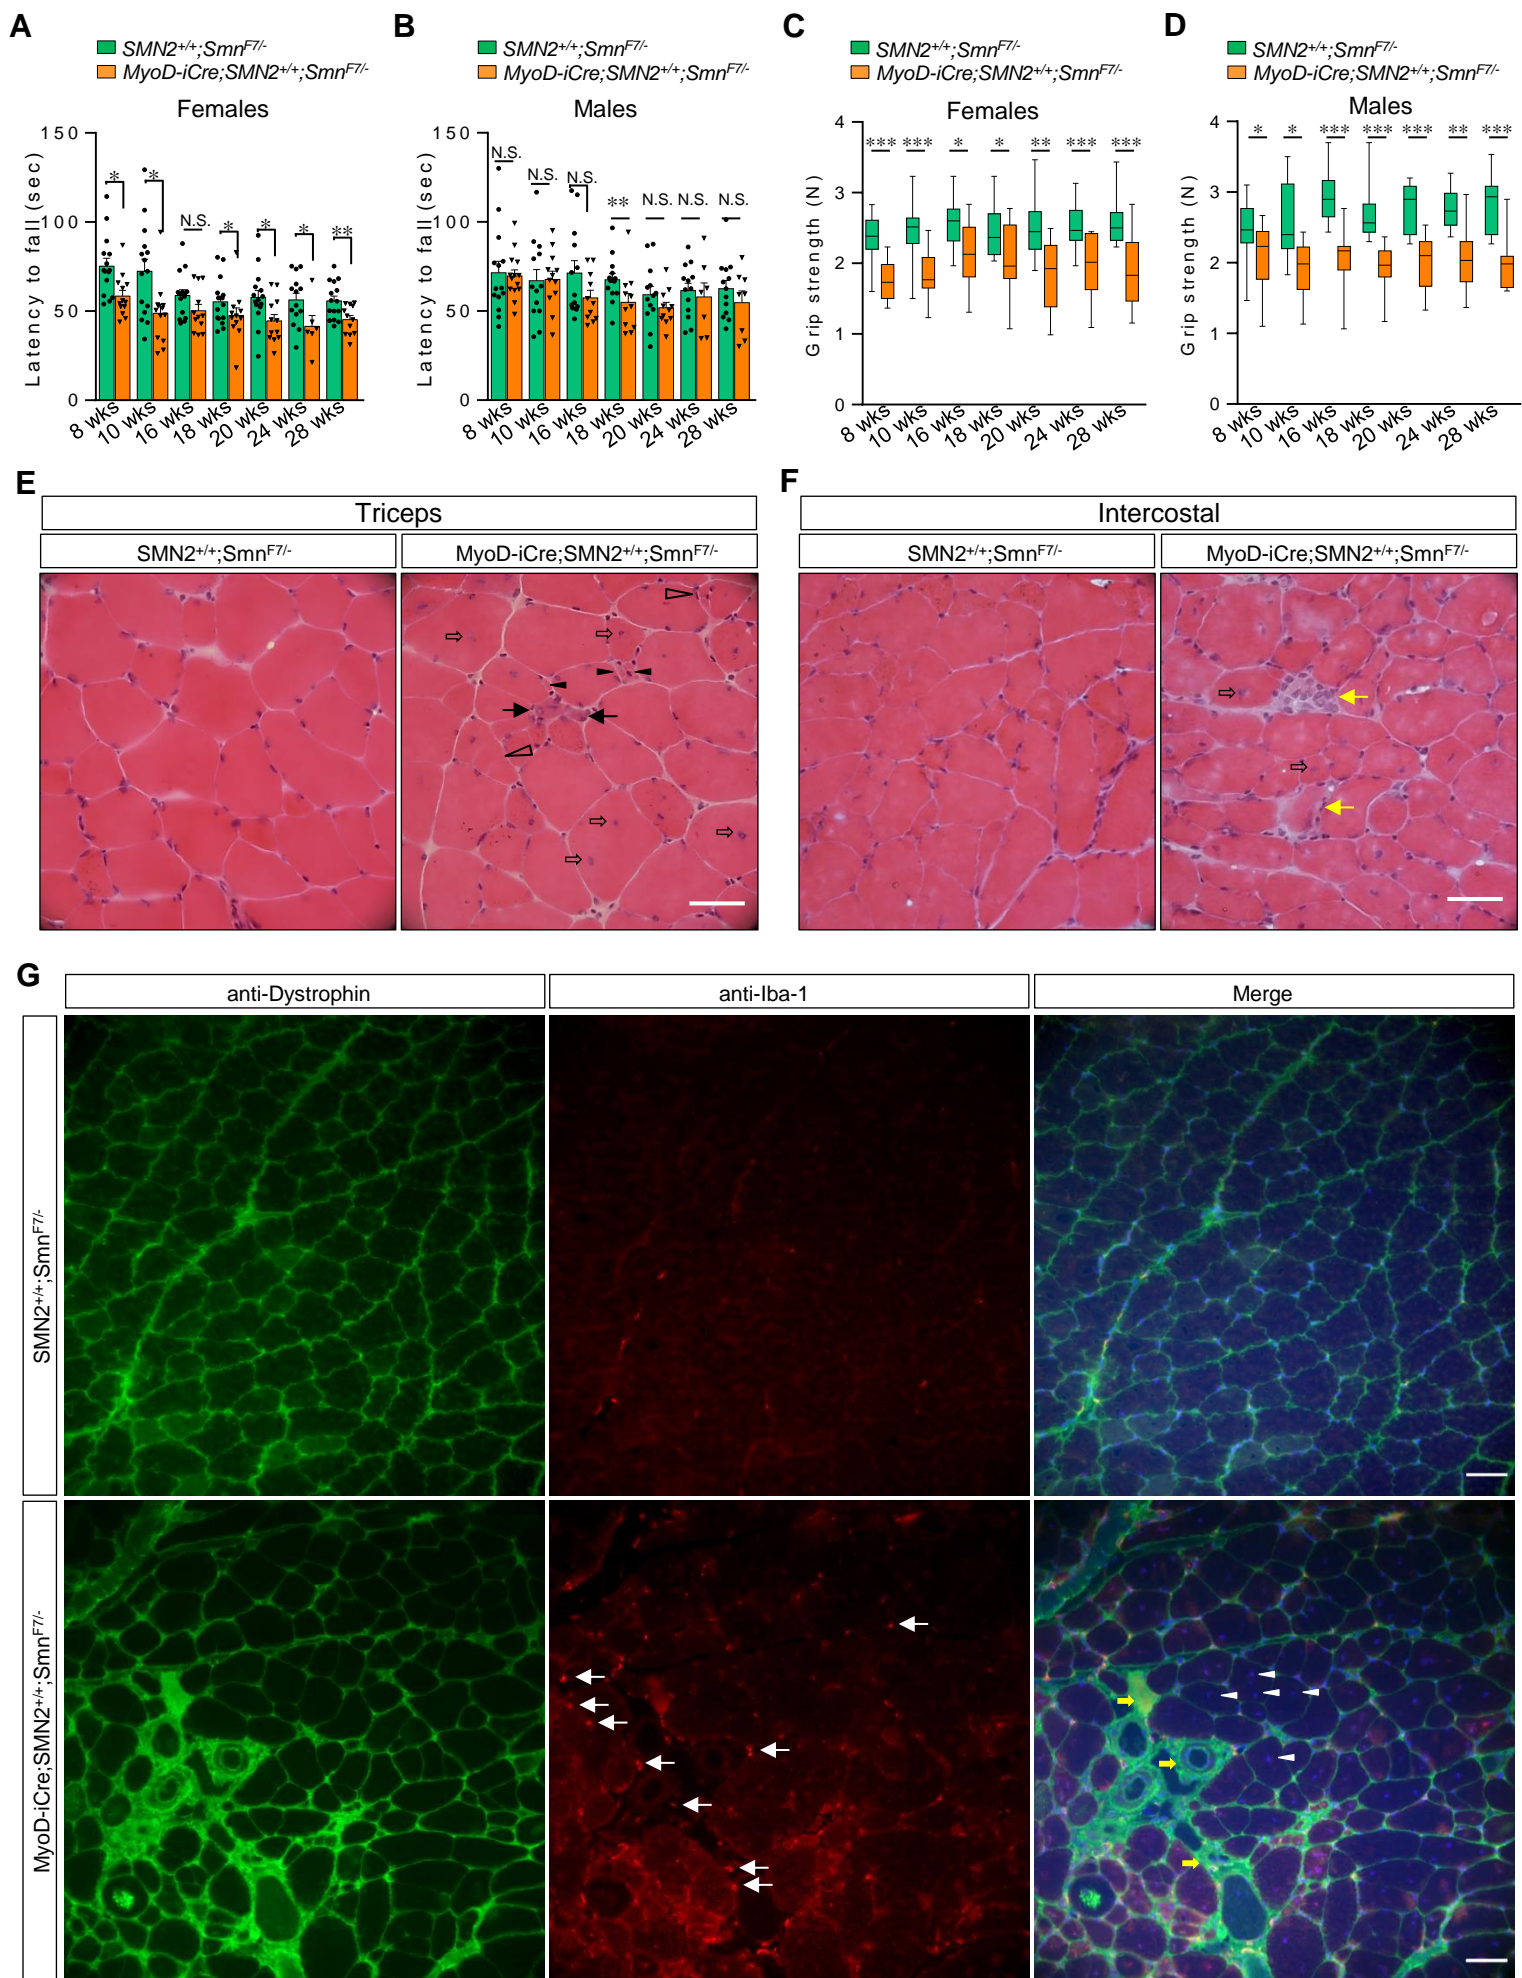

Supplemental Figure 7

**A**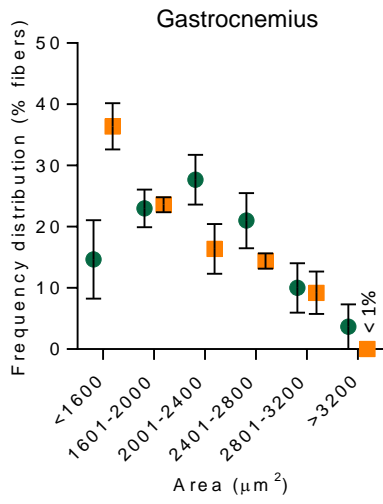**B**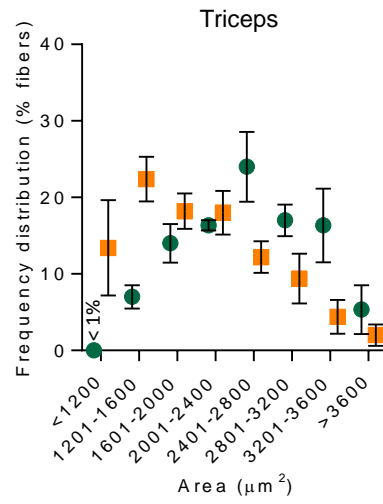**C**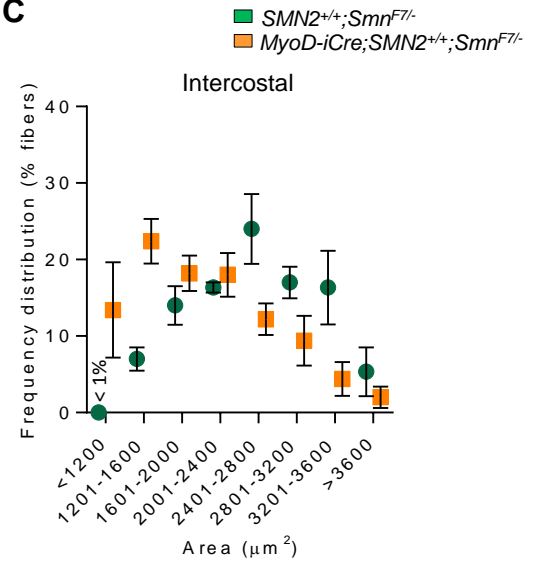**D**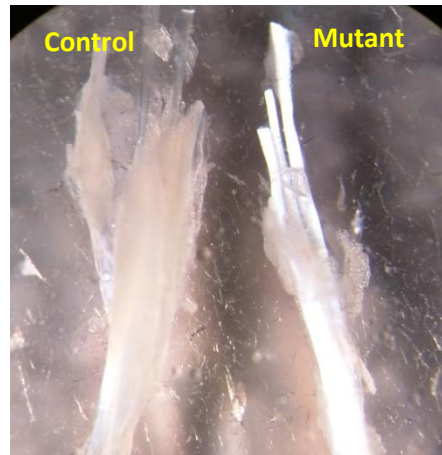



**A**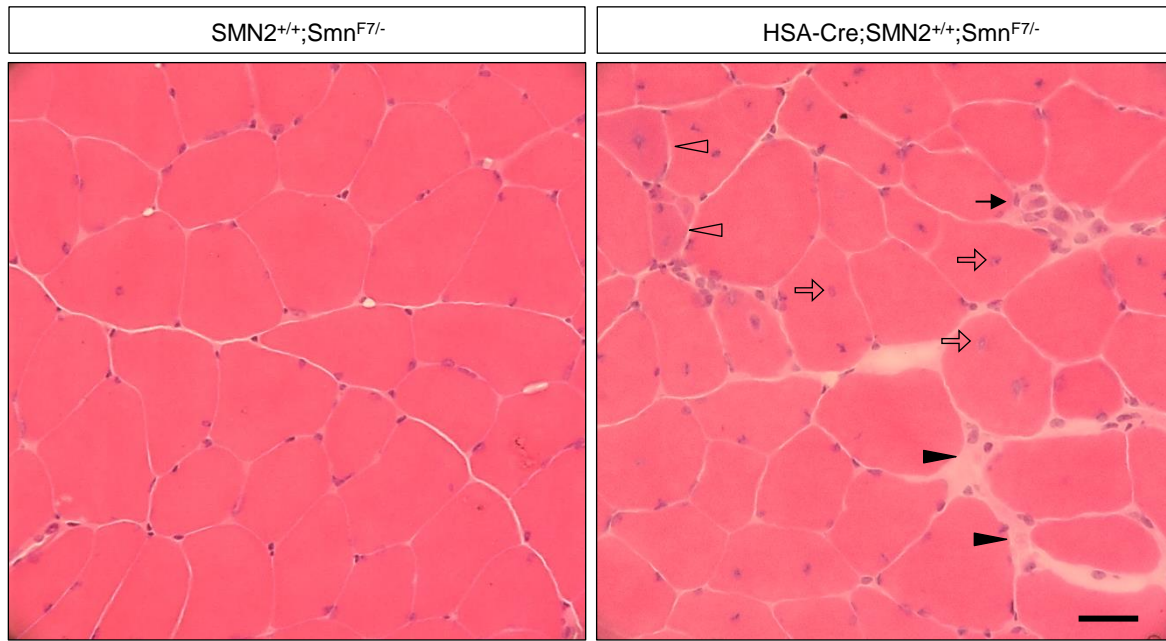**B**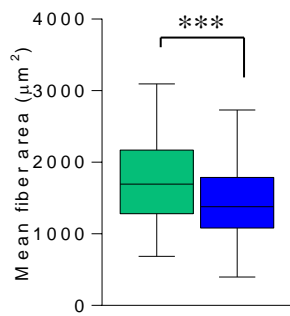**C**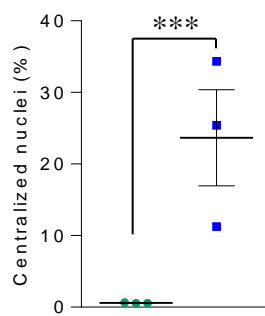**D**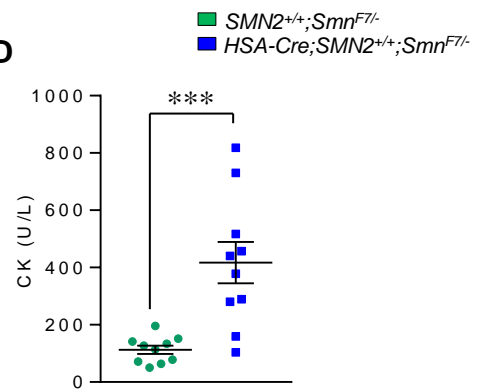**E**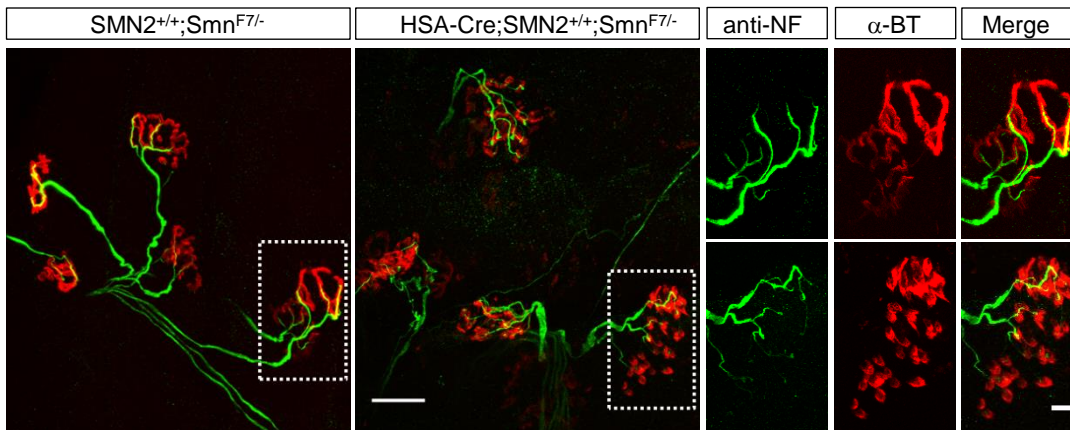**F**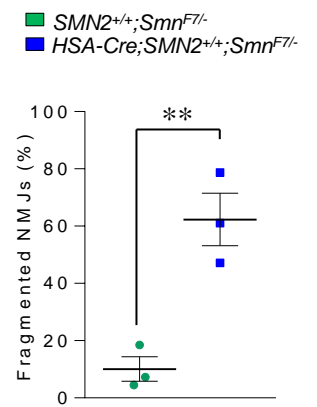

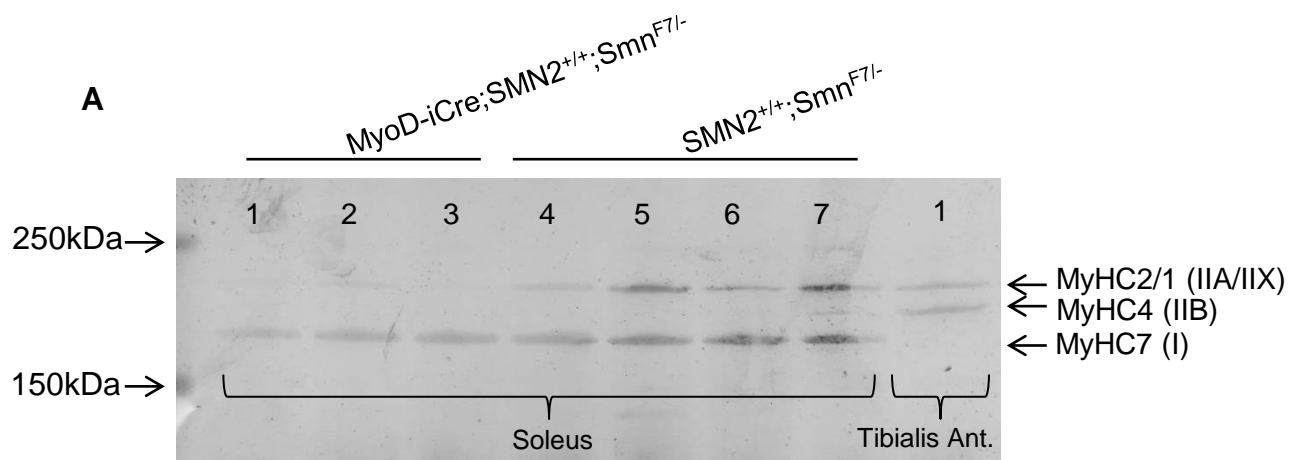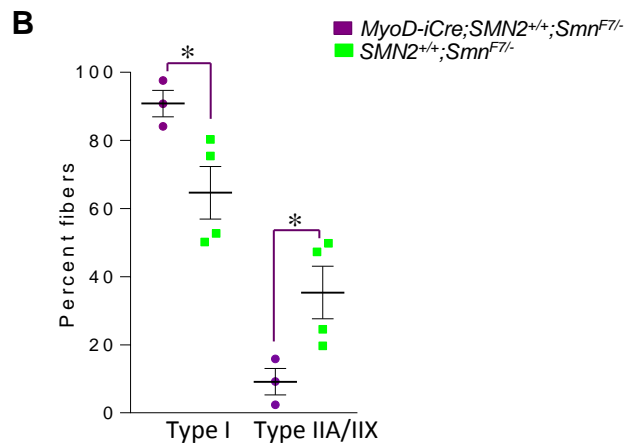

Supplement: jci-130-131989-s265.pdf [file jci-130-131989-s265.pdf]
